# Supplementary material for: Digital microlearning for training and competency development of elderly care personnel: a mixed-methods implementation study to assess needs, effectiveness, and areas of application
Source: Research Square preprint supplement (doi:10.21203/rs.3.rs-1652376/v1), 2022-05-19
Supplement: Supplementary file 1 [file 81080e07f200bab324cd3056.docx]

Appendix 1. Complete version of statements in the surveys to which study participants related their experiences of conducting courses. Translated from Swedish.

Response alternatives to these statements were: Completely disagree, Mostly disagree, Both agree and disagree, Mostly agree, and Completely agree.

- I will remember the (specific course education) content well.
- I very much enjoyed the (specific course education).
- The (specific course education) was very useful in my work.
- Participation in this kind of education was very beneficial for my work.
- I learned many new things from the (specific course education).
- I often used the knowledge obtained from the (specific course education) in my daily work.
- I successfully applied the content from the (specific course education) in my daily work.
- After the (specific course education) I have become more satisfied with my work.
- My work performance has improved by applying the (specific course education) content.
- Overall, I feel that work processes have improved at my workplace by applying the (specific course education) content.
- Overall, I feel that my work environment has improved by applying the (specific course education) content.
